# Supplementary material for: Classification of unknown primary tumors with a data-driven method based on a large microarray reference database
Source: Springer Nature journal article supplement (doi:10.1186/gm279), 2011-09-28
Supplement: 13073_2011_288_MOESM7_ESM.pdf [file 13073_2011_288_MOESM7_ESM.pdf]

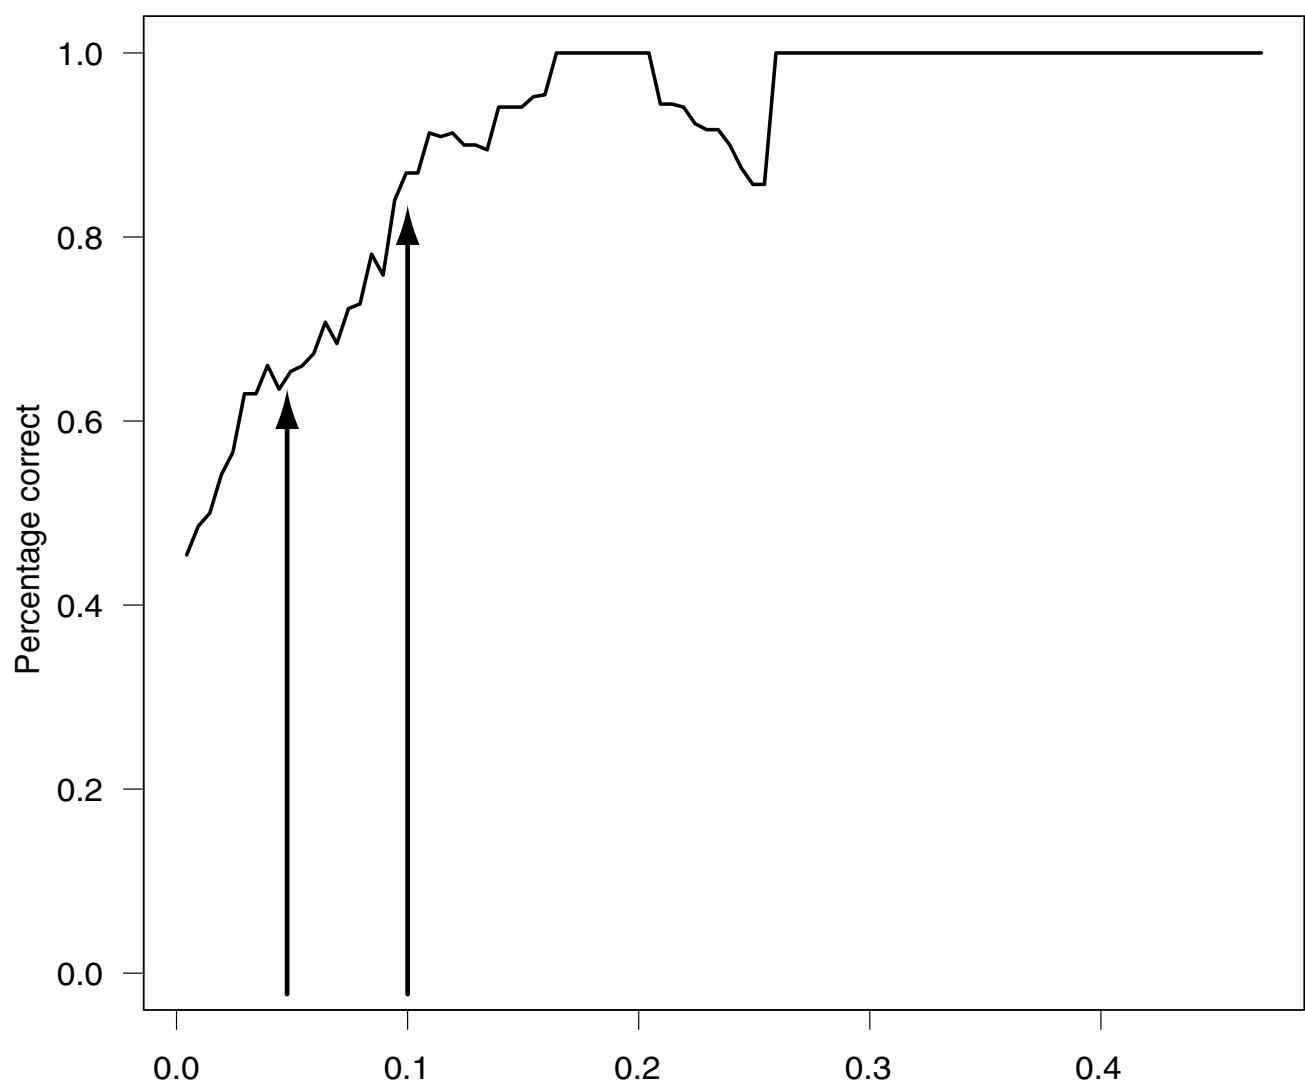

Highest similarity score

Score > 0.01. 50% of samples, 97% accuracy.

Score > 0.05. 69% of samples, 89% accuracy.
