# Supplementary material for: Classification of unknown primary tumors with a data-driven method based on a large microarray reference database
Source: Springer Nature journal article supplement (doi:10.1186/gm279), 2011-09-28

**(a)**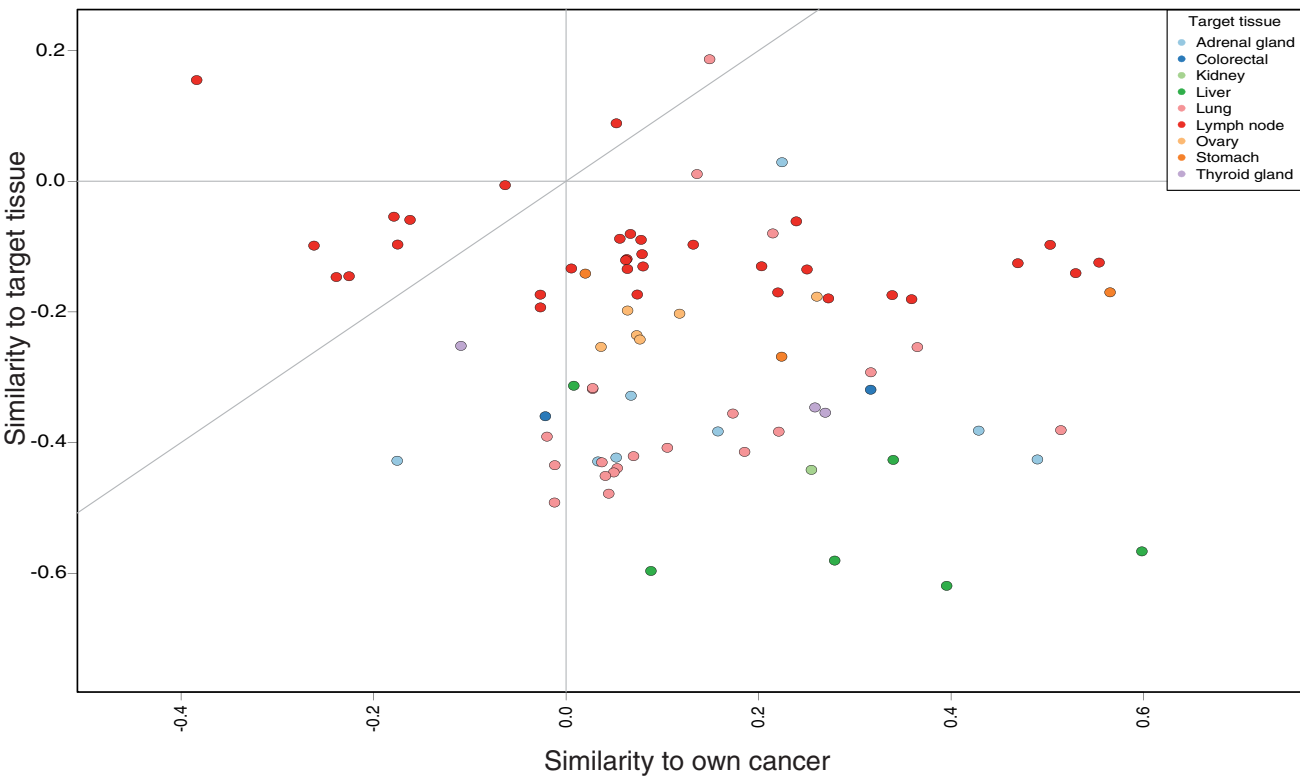**(b)**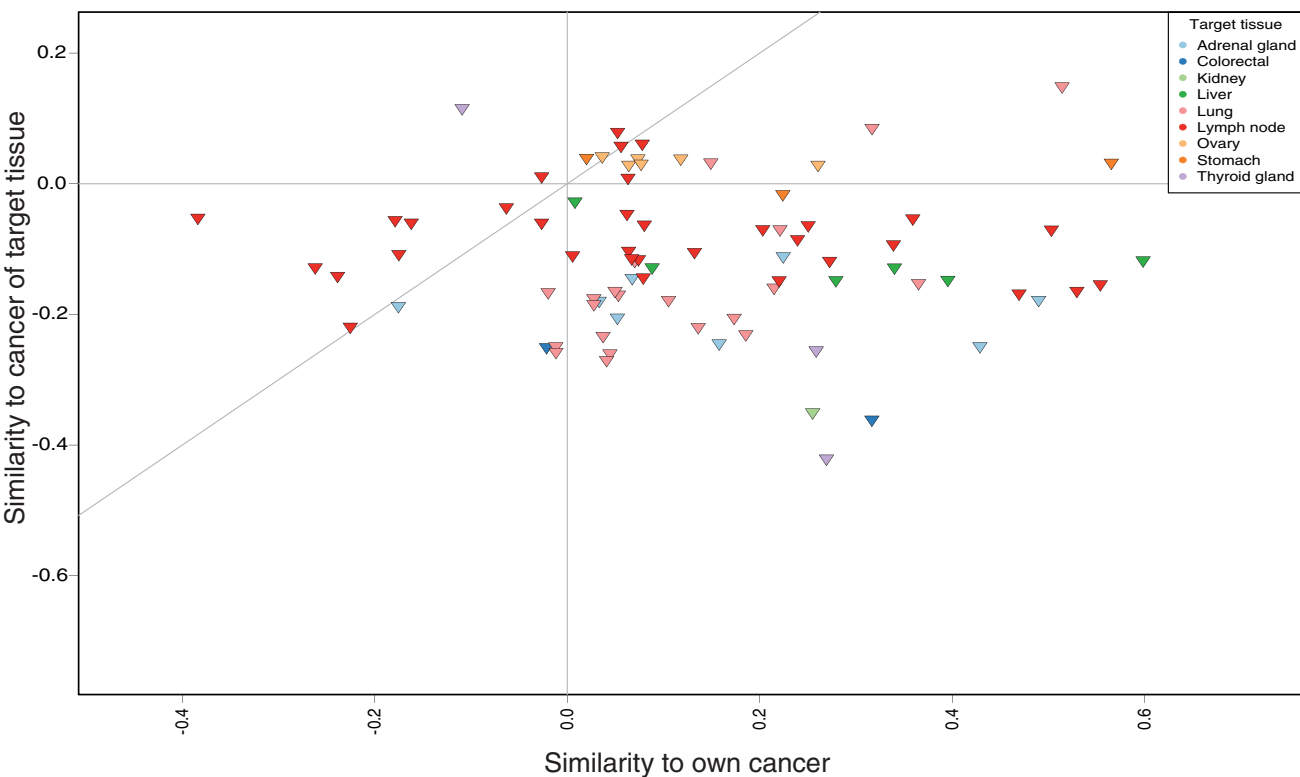

Supplement: 13073_2011_288_MOESM8_ESM.pdf [file 13073_2011_288_MOESM8_ESM.pdf]
